# Supplementary material for: Increased MCL-1 synthesis promotes irradiation-induced nasopharyngeal carcinoma radioresistance via regulation of the ROS/AKT loop
Source: PubMed Central journal article supplement (PMC8827103; doi:10.1038/s41419-022-04551-z), 2022-02-08
Supplement: 41419_2022_4551_MOESM11_ESM.pdf [file 41419_2022_4551_MOESM11_ESM.pdf]

Re:Adding co-authors in our manuscript ☆ 𠄎

发件人: [mozhiwen308](mailto:mozhiwen308@163.com) <mozhiwen308@163.com> 自动归档  
时 间: 2022年1月10日(星期一) 上午8:30  
收件人: [袁亚维](mailto:yuanyawei@gzhmu.edu.cn) <yuanyawei@gzhmu.edu.cn>

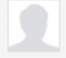

翻译全文 | 𠄎 𠄎 𠄎

I agree with the changes.  
Zhiwen Mo.

At 2022-01-09 22:09:53, "袁亚维" <[yuanyawei@gzhmu.edu.cn](mailto:yuanyawei@gzhmu.edu.cn)> wrote:

Dear all,  
Chun-shan Liu and Huiping Liang would be listed as co-authors in our submitted manuscript after peer-review as they helped to provide important research data for review. Please feel free to contact me by email if you have any questions.  
Best Regards,  
Yawei

回复:Adding co-authors in our manuscript ☆ 𠄎

发件人: [Yingying Liang](mailto:Yingying Liang <2015684002@gzhmu.edu.cn) <2015684002@gzhmu.edu.cn>  
时 间: 2022年1月9日(星期天) 晚上10:11  
收件人: [袁亚维](mailto:yuanyawei@gzhmu.edu.cn) <yuanyawei@gzhmu.edu.cn>

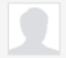

翻译全文 | 𠄎 𠄎 𠄎

Dear Yawei,  
I agree with the changes.  
Yingying

-----原始邮件-----

发件人: "袁亚维" <[yuanyawei@gzhmu.edu.cn](mailto:yuanyawei@gzhmu.edu.cn)>;  
发送时间: 2022年1月9日(星期天) 晚上10:09  
收件人: "yingyingliang" <[yingyingliang@gzhmu.edu.cn](mailto:yingyingliang@gzhmu.edu.cn)>;"jianglili" <[jianglili@gzhmu.edu.cn](mailto:jianglili@gzhmu.edu.cn)>;"shaoxunfan" <[shaoxunfan@hotmail.com](mailto:shaoxunfan@hotmail.com)>;"mozhiwen308" <[mozhiwen308@163.com](mailto:mozhiwen308@163.com)>;"18302078099" <[18302078099@163.com](mailto:18302078099@163.com)>;"xuanan" <[xuanan@gzhmu.edu.cn](mailto:xuanan@gzhmu.edu.cn)>;"001397" <[001397@sina.com.cn](mailto:001397@sina.com.cn)>;"1105600015" <[1105600015@qq.com](mailto:1105600015@qq.com)>;"lianghuiping" <[lianghuiping@gzhmu.edu.cn](mailto:lianghuiping@gzhmu.edu.cn)>;  
主题: Adding co-authors in our manuscript

Dear all,  
Chun-shan Liu and Huiping Liang would be listed as co-authors in our submitted manuscript after peer-review as they helped to provide important research data for review. Please feel free to contact me by email if you have any questions.  
Best Regards,  
Yawei

回复: Adding co-authors in our manuscript ☆

发件人: 18302078099 <18302078099@163.com> 自动归档  
时 间: 2022年1月9日(星期天) 晚上10:29  
收件人: 袁亚维 <yuanyawei@gzhmu.edu.cn>

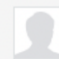

翻译全文 | 打印 | 分享

dear yawei  
I agree with the changes.  
Feiyu Niu

发自我的手机

----- 原始邮件 -----

发件人: 袁亚维 <yuanyawei@gzhmu.edu.cn>  
日期: 2022年1月9日周日 晚上10:09  
收件人: yingyingliang <yingyingliang@gzhmu.edu.cn>, jianglili <jianglili@gzhmu.edu.cn>, shaoxunfan <shaoxunfan@hotmail.com>, mozhiwen308 <mozhiwen308@163.com>, 18302078099 <18302078099@163.com>, xuanan <xuanan@gzhmu.edu.cn>, 001397 <001397@sina.com.cn>, 1105600015 <1105600015@qq.com>, lianghuiping <lianghuiping@gzhmu.edu.cn>  
主题: Adding co-authors in our manuscript

Dear all,  
Chun-shan Liu and Huiping Liang would be listed as co-authors in our submitted manuscript after peer-review as they helped to provide important research data for review. Please feel free to contact me by email if you have any questions.

Best Regards,

Yawei

Re:Adding co-authors in our manuscript ☆

发件人: 徐安安 <xuanan@gzhmu.edu.cn>  
时 间: 2022年1月9日(星期天) 晚上10:32  
收件人: 袁亚维 <yuanyawei@gzhmu.edu.cn>

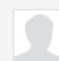

翻译全文 | 打印 | 分享

Dear Yawei,  
I agree with the changes.  
Xu anan

----- Original -----

**From:** "袁亚维" <yuanyawei@gzhmu.edu.cn>;  
**Date:** Sun, Jan 9, 2022 10:09 PM  
**To:** "yingyingliang" <yingyingliang@gzhmu.edu.cn>; "jianglili" <jianglili@gzhmu.edu.cn>; "shaoxunfan" <shaoxunfan@hotmail.com>; "mozhiwen308" <mozhiwen308@163.com>; "18302078099" <18302078099@163.com>; "徐安安" <xuanan@gzhmu.edu.cn>; "001397" <001397@sina.com.cn>; "1105600015" <1105600015@qq.com>; "lianghuiping" <lianghuiping@gzhmu.edu.cn>;  
**Subject:** Adding co-authors in our manuscript

Dear all,  
Chun-shan Liu and Huiping Liang would be listed as co-authors in our submitted manuscript after peer-review as they helped to provide important research data for review. Please feel free to contact me by email if you have any questions.

Best Regards,

Yawei

Dear Yawei,

I agree with the changes.

Lili Jiang

-----

该邮件从移动设备发送

-----原始邮件-----

发件人: "袁亚维" <yuanyawei@gzhmu.edu.cn>;  
发送时间: 2022年1月9日(星期天) 晚上10:09  
收件人: "yingyingliang" <yingyingliang@gzhmu.edu.cn>;"jianglili" <jianglili@gzhmu.edu.cn>;"shaoxunfan" <shaoxunfan@hotmail.com>;"mozhiwen308" <mozhiwen308@163.com>;"18302078099" <18302078099@163.com>;"xuanan" <xuanan@gzhmu.edu.cn>;"001397" <001397@sina.com.cn>;"1105600015" <1105600015@qq.com>;"lianghuiping" <lianghuiping@gzhmu.edu.cn>;  
主题: Adding co-authors in our manuscript

Dear all,  
Chun-shan Liu and Huiping Liang would be listed as co-authors in our submitted manuscript after peer-review as they helped to provide important research data for review. Please feel free to contact me by email if you have any questions.  
Best Regards,  
Yawei

回复: Adding co-authors in our manuscript ☆ 已

发件人: 1105600015 <1105600015@qq.com> 自动归档  
时间: 2022年1月9日(星期天) 晚上10:29  
收件人: 袁亚维 <yuanyawei@gzhmu.edu.cn>

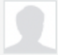

翻译全文 | 图标

Dear Yawei,  
I agree with the changes.  
Chun-shan Liu

-----原始邮件-----

发件人: "袁亚维" <yuanyawei@gzhmu.edu.cn>;  
发送时间: 2022年1月9日(星期天) 晚上10:09  
收件人: "yingyingliang" <yingyingliang@gzhmu.edu.cn>;"jianglili" <jianglili@gzhmu.edu.cn>;"shaoxunfan" <shaoxunfan@hotmail.com>;"mozhiwen308" <mozhiwen308@163.com>;"18302078099" <18302078099@163.com>;"xuanan" <xuanan@gzhmu.edu.cn>;"001397" <001397@sina.com.cn>;"fly\$纶 \ sea 丕" <1105600015@qq.com>;"lianghuiping" <lianghuiping@gzhmu.edu.cn>;  
主题: Adding co-authors in our manuscript

Dear all,  
Chun-shan Liu and Huiping Liang would be listed as co-authors in our submitted manuscript after peer-review as they helped to provide important research data for review. Please feel free to contact me by email if you have any questions.  
Best Regards,  
Yawei

Re:Adding co-authors in our manuscript ☆

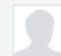

发件人: 梁惠平 <lianghui ping@gzhmu.edu.cn>

时 间: 2022年1月9日(星期天) 晚上10:29

收件人: 袁亚维 <yuanyawei@gzhmu.edu.cn>

翻译全文 | 打印 | 分享

Dear Yawei,  
I agree with the changes.  
Huiping Liang

----- Original -----

**From:** "袁亚维" <yuanyawei@gzhmu.edu.cn>;  
**Date:** Sun, Jan 9, 2022 10:09 PM  
**To:** "yingyingliang" <yingyingliang@gzhmu.edu.cn>; "jianglili" <jianglili@gzhmu.edu.cn>; "shaoxunfan" <shaoxunfan@hotmail.com>; "mozhiwen308" <mozhiwen308@163.com>; "18302078099" <18302078099@163.com>; "xuanan" <xuanan@gzhmu.edu.cn>; "001397" <001397@sina.com.cn>; "1105600015" <1105600015@qq.com>; "lianghui ping" <lianghui ping@gzhmu.edu.cn>;  
**Subject:** Adding co-authors in our manuscript

Dear all,  
Chun-shan Liu and Huiping Liang would be listed as co-authors in our submitted manuscript after peer-review as they helped to provide important research data for review. Please feel free to contact me by email if you have any questions.  
Best Regards,  
Yawei

Dear Yawei,  
I agree with the changes.  
Yu-fan Huang

----- 原始邮件 -----

发件人: "袁亚维" <yuanyawei@gzhmu.edu.cn>  
收件人: "yingyingliang" <yingyingliang@gzhmu.edu.cn>, "jianglili" <jianglili@gzhmu.edu.cn>, "shaoxunfan" <shaoxunfan@hotmail.com>, "mozhiwen308" <mozhiwen308@163.com>, "18302078099" <18302078099@163.com>, "xuanan" <xuanan@gzhmu.edu.cn>, "001397" <001397@sina.com.cn>, "1105600015" <1105600015@qq.com>, "lianghui ping" <lianghui ping@gzhmu.edu.cn>  
主题: Adding co-authors in our manuscript  
日期: 2022年01月09日 22点09分

Dear all,  
Chun-shan Liu and Huiping Liang would be listed as co-authors in our submitted manuscript after peer-review as they helped to provide important research data for review. Please feel free to contact me by email if you have any questions.  
Best Regards,  
Yawei

**Re: Adding co-authors in our manuscript** ☆ 𠄎

发件人: [dr.shaoxunfan@qq.com](mailto:dr.shaoxunfan@qq.com) <dr.shaoxunfan@qq.com>

时间: 2022年1月10日(星期一) 上午9:01

收件人: 袁亚维 <yuanyawei@gzhmu.edu.cn>; 1305224951 <1305224951@qq.com>

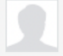

翻译全文 | 𠄎 𠄎 𠄎

为了营造绿色健康的邮箱环境，我们了解一下，这是否您订阅的邮件？ [是我订阅的](#) [不是我订阅的](#) [我不确定](#) [自动归档](#)

Dear Dr. Yuan

I agree with the changes.

Xunfan Shao

---

[dr.shaoxunfan@qq.com](mailto:dr.shaoxunfan@qq.com)

---

**From:** [袁亚维](#)

**Date:** 2022-01-09 22:51

**To:** [1305224951](#)

**Subject:** Adding co-authors in our manuscript

Dear Dr. Shao,

Chun-shan Liu and Huiping Liang would be listed as co-authors in our submitted manuscript after peer-review as they helped to provide important research data for review. Please feel free to contact me by email if you have any questions.

Best Regards,

Yawei
